# Supplementary material for: Macrophage adaptation leads to parallel evolution of genetically diverse Escherichia coli small‐colony variants with increased fitness in vivo and antibiotic collateral sensitivity
Source: PubMed Central journal article supplement (PMC4999529; doi:10.1111/eva.12397), 2016-06-30

### Rich media: RPMI

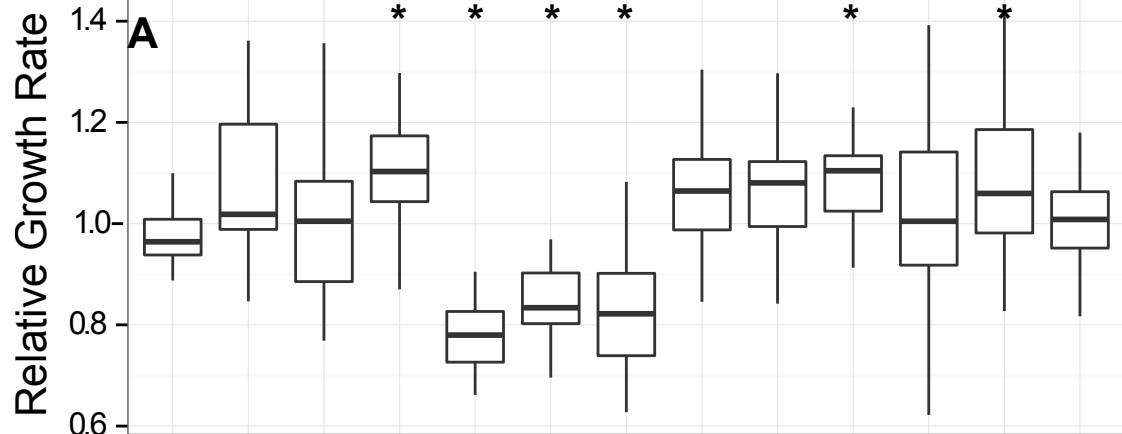

### Poor media: M9, 0.4% glucose

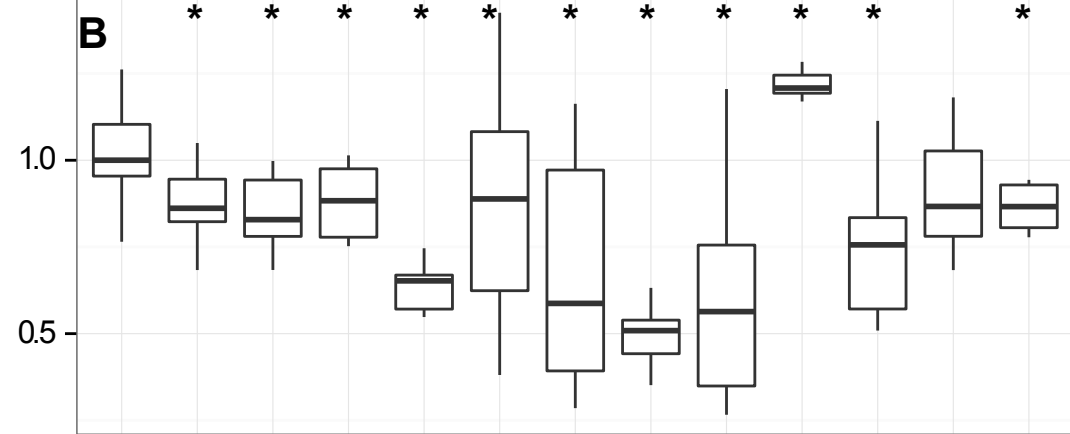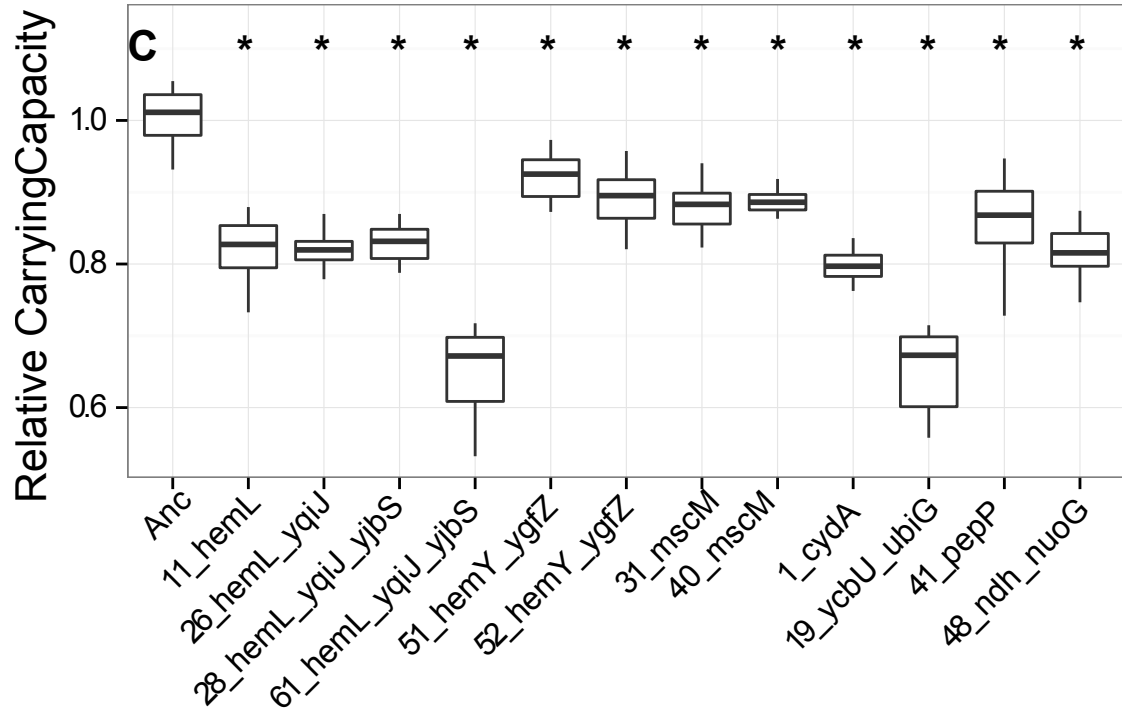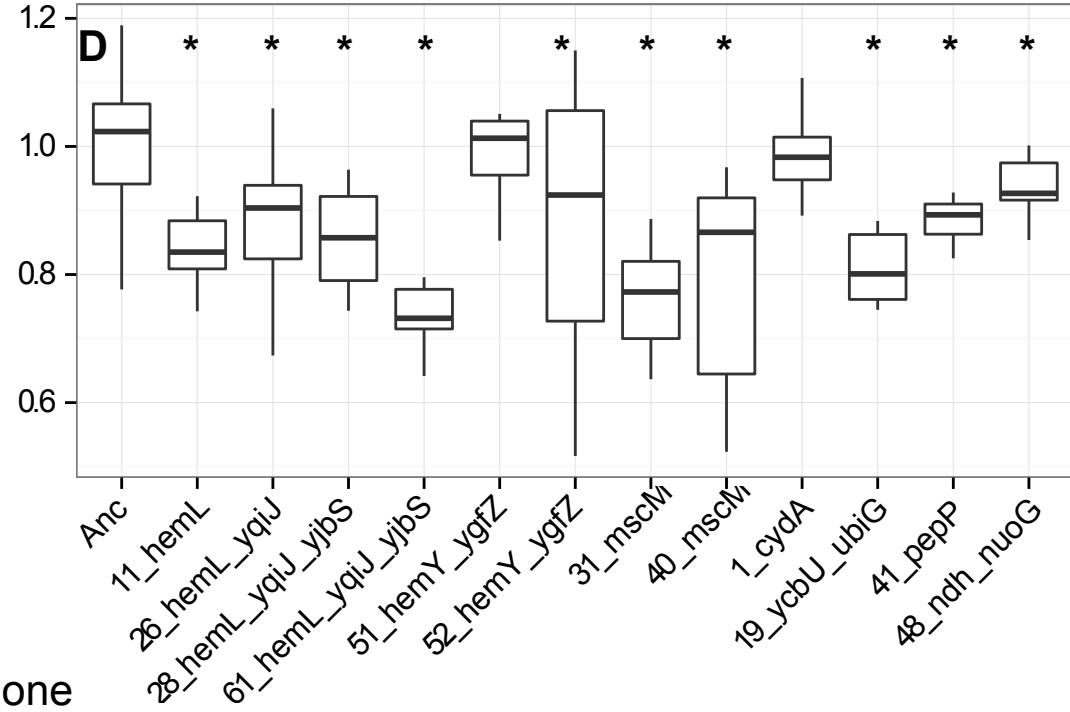

Supplement: EVA-9-0994-s006.pdf [file EVA-9-0994-s006.pdf]
